# Supplementary material for: Fabrication, Characterization and Photocatalytic Activity of Copper Oxide Nanowires Formed by Anodization of Copper Foams
Source: MDPI journal article supplement (doi:10.3390/ma14175030), 2021-09-02
Supplement: s1 [file s1]

Article

# Fabrication, Characterization and Photocatalytic Activity of Copper Oxide Nanowires Formed by Anodization of Copper Foams

Alaa M. Abd-Elnaiem <sup>1,2,\*</sup>, Moustafa A. Abdel-Rahim <sup>1,2</sup>, Atta Y. Abdel-Latief <sup>1,2</sup>,  
Ahmed Abdel-Rahim Mohamed <sup>1,2</sup>, Kristina Mojsilović <sup>3</sup> and Wojciech Jerzy Stepniowski <sup>4,\*</sup>

<sup>1</sup> Physics Department, Faculty of Science, Assiut University, Assiut 71516, Egypt;

mabdelrahim@aun.edu.eg (M.A.A.-R.); attayousef@aun.edu.eg (A.Y.A.-L.);

ahmed.201297@science.au.edu.eg (A.A.-R.M.)

<sup>2</sup> Academy of Scientific Research and Technology (ASRT) of the Arab Republic of Egypt, Cairo 11516, Egypt

<sup>3</sup> Faculty of Physics, University of Belgrade, Studentski trg 12–16, 11000 Belgrade, Serbia;

kristina.mojsilovic@ff.bg.ac.rs

<sup>4</sup> Faculty of Advanced Technology and Chemistry, Institute of Materials Science & Engineering,

Military University of Technology, Kaliskiego 2 Str., 00908 Warszawa, Poland

\* Correspondence: abd-elnaiem@aun.edu.eg (A.M.A.-E.); wojciech.stepniowski@wat.edu.pl (W.J.S.)

**Keywords:** copper oxides; anodization; nanowires; FTIR; photocatalytic decolorization; nanostructures; tenorite; cuprite; paramelconite; malachite

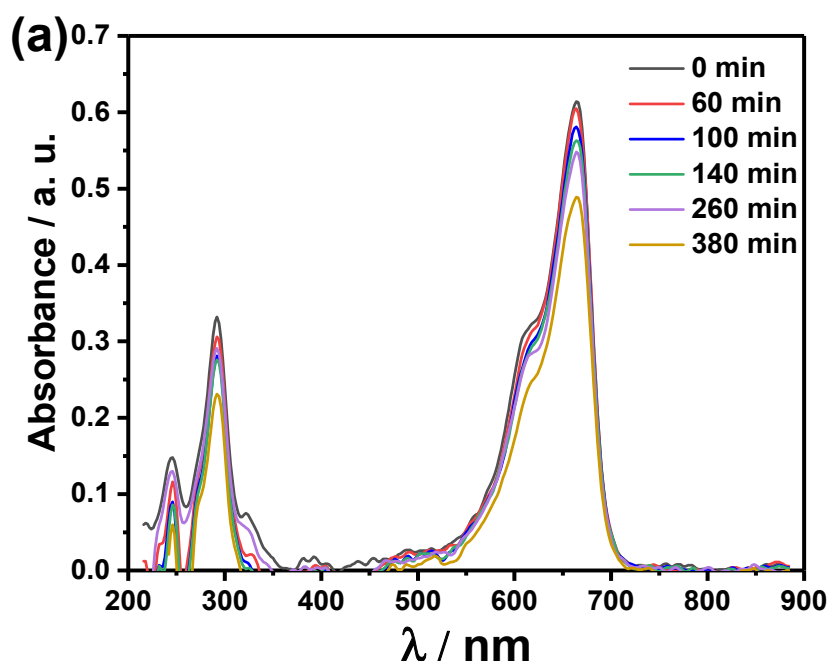

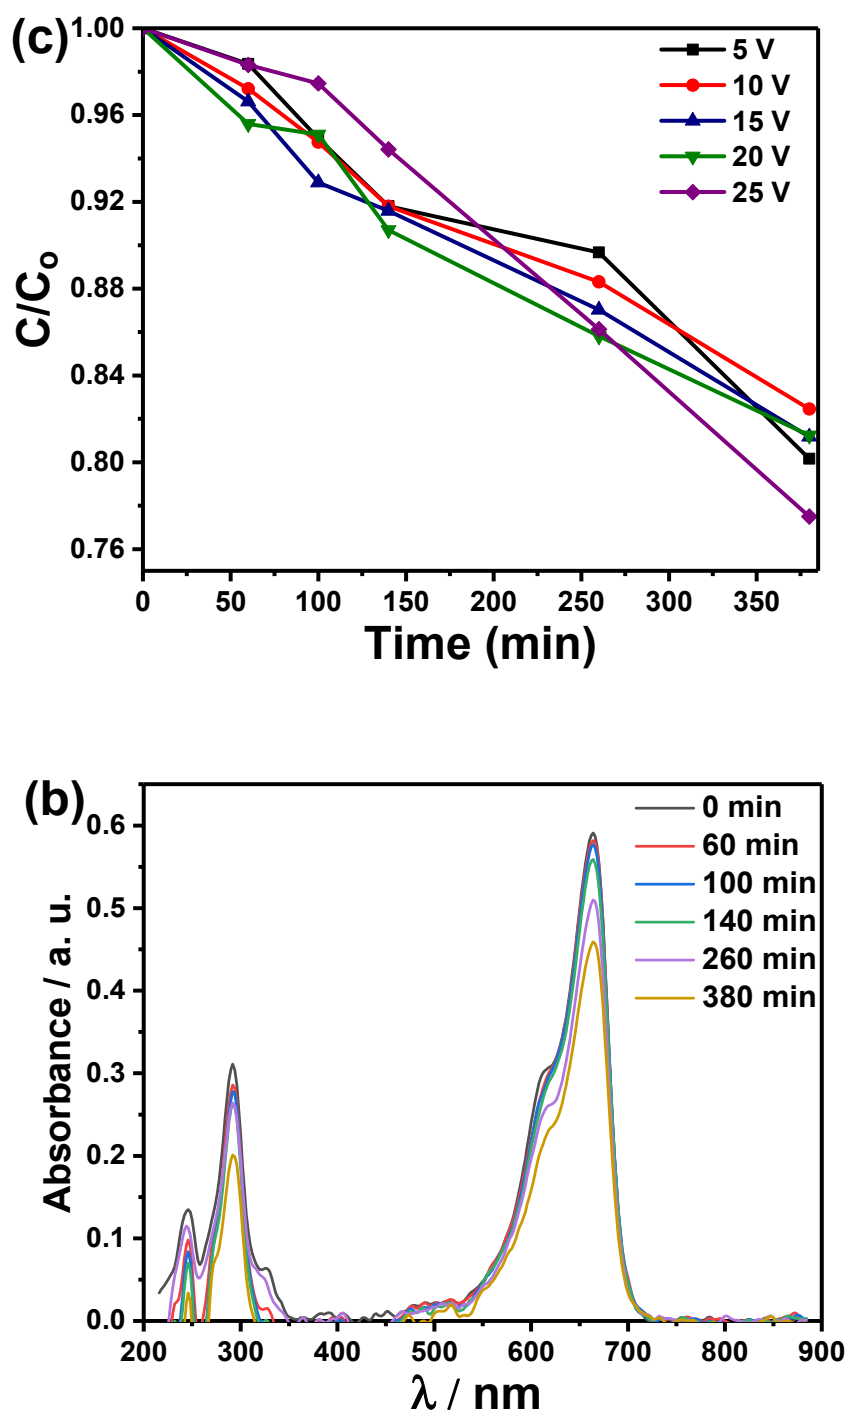

**Figure S1.** The optical absorbance spectra of MB at various periods of irradiation to the ultraviolet irradiation using anodized copper foam in 0.1 M  $K_2CO_3$  at (a) 5, and (b) 25 V as a catalyst, and (c) rate of MB dye photodegradation with anodized copper foam as catalysts.

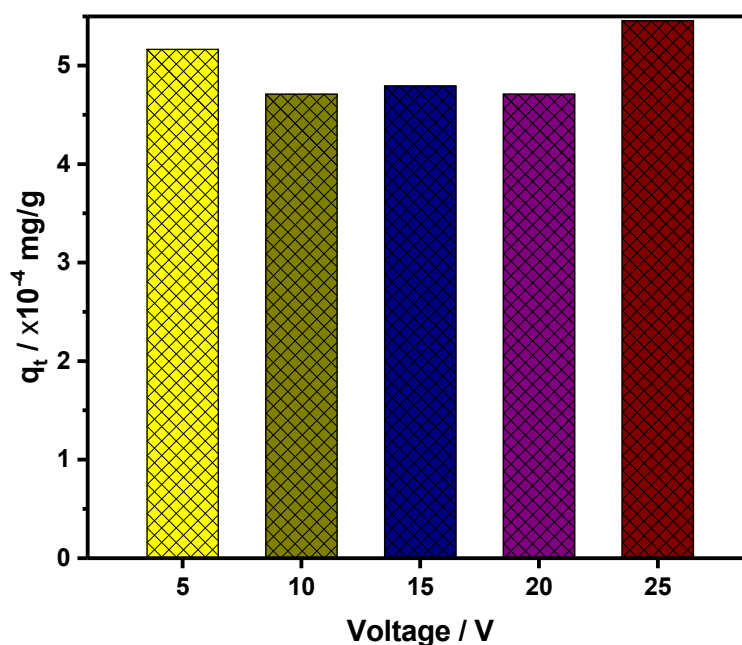

**Figure S2.** Histogram plot shows the adsorption capacity ( $q_t$ ) of methylene blue (MB) using anodized copper foam in 0.1 M  $K_2CO_3$  at various anodizing voltages 5, 10, 15, 20, 25, and 25 V as a catalyst after irradiation for 380 min.

**Figure S3** illustrates the pseudo-second-order kinetic model for MB degradation on the copper oxide nanostructures. It illustrates a linear plot for the relation of  $\frac{t}{q_t}$  versus  $t$ . The fitting correlation coefficients ( $R^2$ ) for the applied pseudo-second-order kinetic for copper foams anodized at 5, 10, 15, 20, and 25 V are equals 0.20, 0.82, 0.58, 0.27, and 0.78, respectively. From the intercept of the fitted lines, the value of  $K_2$  is obtained and changed between 0.41–5.79 g/mg·min and is listed for various copper oxide samples in **Table 1**. The maximum and minimum value of  $K_2$  was for copper foams anodized at 25, and 20 V, respectively. Furthermore, the values of  $q_e$  were calculated for MB degradation using the copper oxide nanostructured were calculated from the slope of the fitted line in **Figure S3** and listed in **Table 1**.

The relation between  $q_t$  and  $\sqrt{t}$ , for the degradation process for MB using copper oxide nanostructured is shown in **Figure S4**. It illustrates a linear plot for the relation of  $q_t$  and  $\sqrt{t}$ . The fitting correlation coefficients ( $R^2$ ) for the applied intra-particle diffusion kinetic model for copper foams anodized at 5, 10, 15, 20, and 25 V are equals 0.92, 0.98, 0.98, 0.94, and 0.95, respectively. From the obtained and fitted line, we have calculated both the values of  $K_{diff}$  and  $C$  for copper oxide nanostructures. The maximum estimated values of  $K_{diff}$  and  $C$  are  $3.72 \times 10^{-5}$  mg/min<sup>1/2</sup>g, and  $-2.85 \times 10^{-4}$ , respectively, and they were observed for adsorption of MB onto copper foams anodized at 25 V. These values for other investigated samples are listed in **Table 1**.

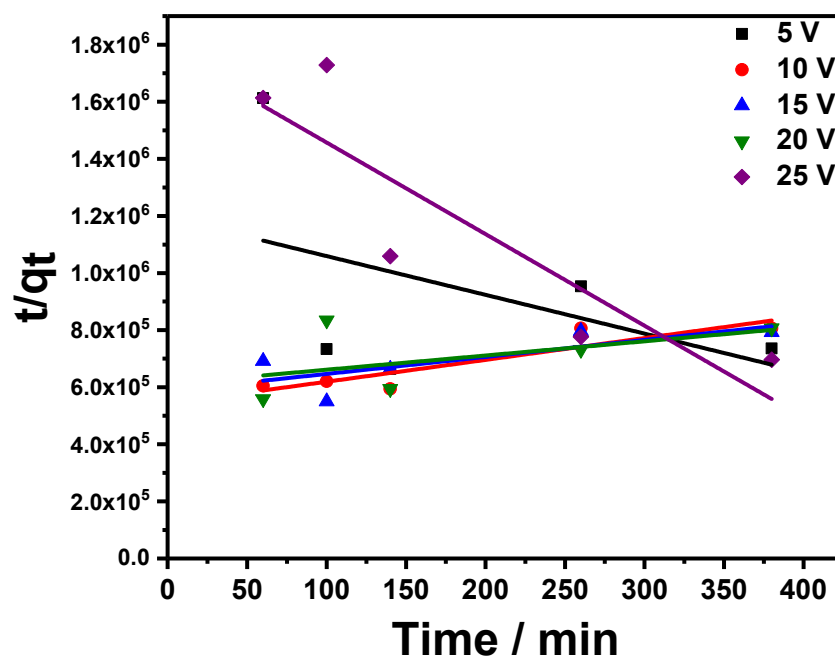

Figure S3. Pseudo-second-order kinetic model for adsorption of methylene blue (MB) using anodized copper foam in 0.1 M K<sub>2</sub>CO<sub>3</sub> at 5, 10, 15, 20, 25, and 25 V as a catalyst.

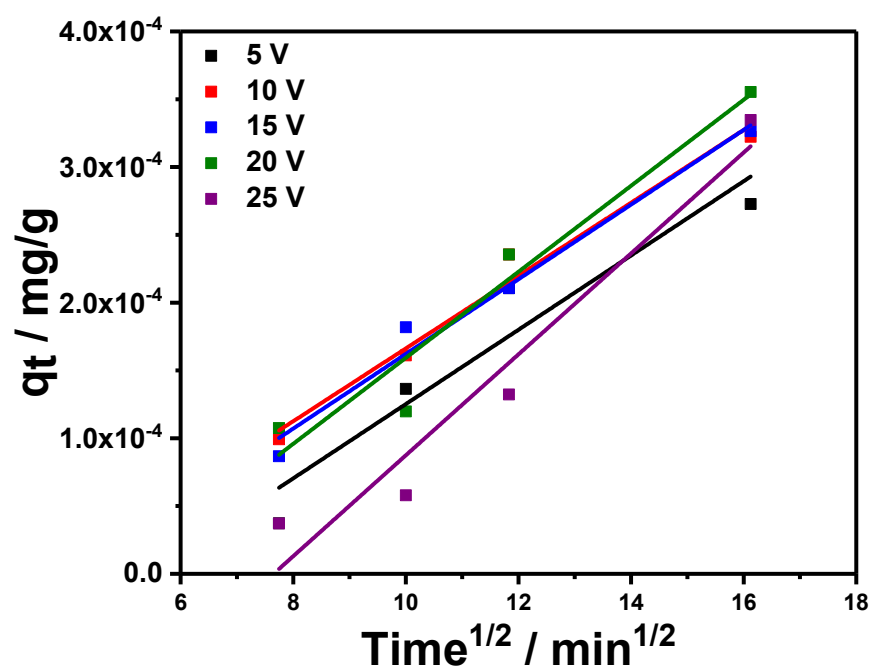

Figure S4. Intra-particle diffusion model for adsorption of methylene blue (MB) using anodized copper foam in 0.1 M K<sub>2</sub>CO<sub>3</sub> at 5, 10, 15, 20, 25, and 25 V as a catalyst.
